# Supplementary material
Source: PubMed Central journal article supplement (PMC3271000)

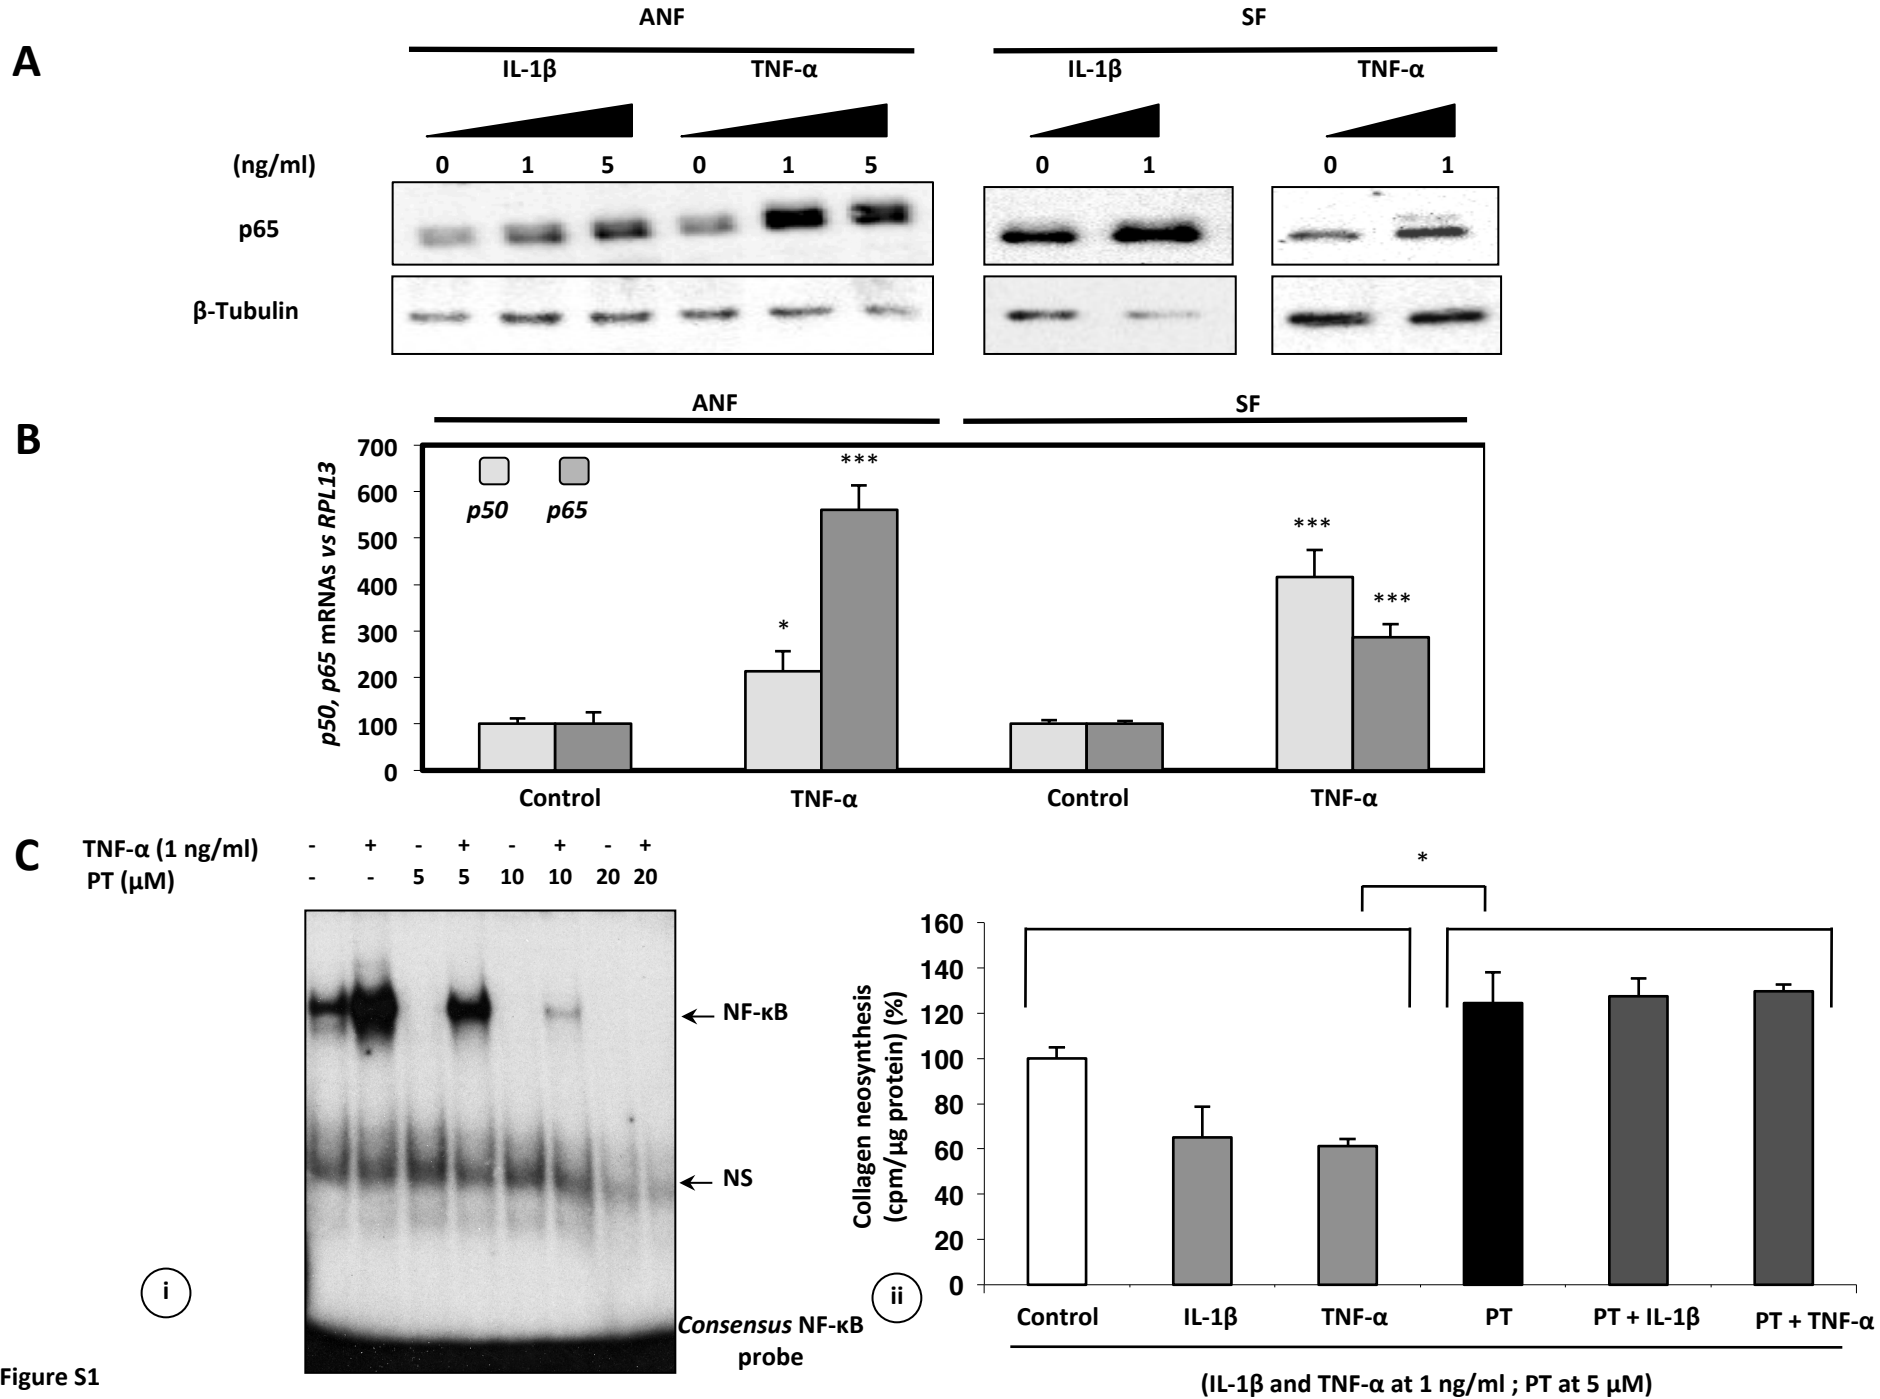

A

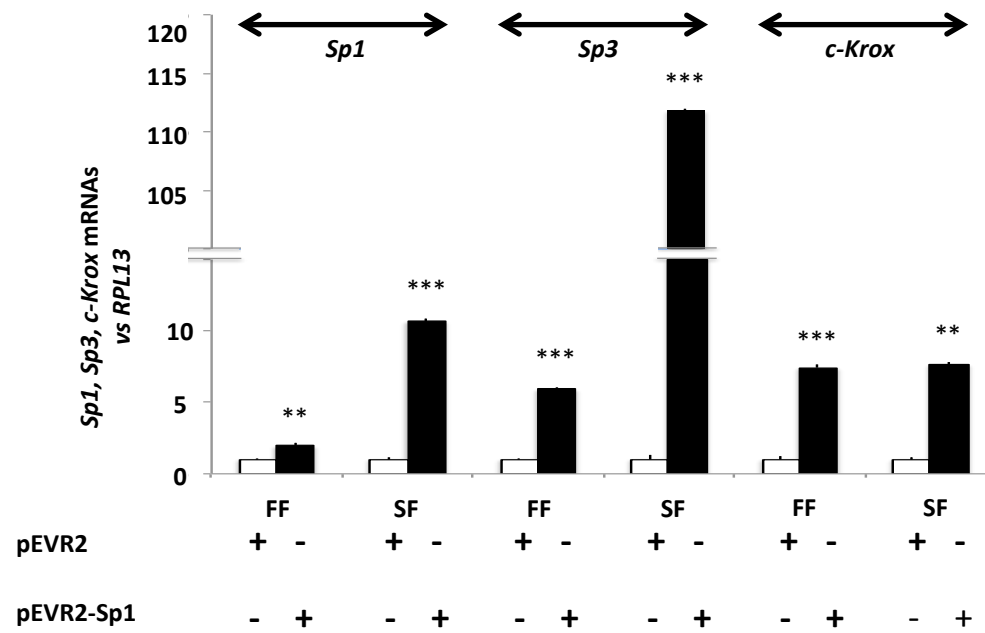

B

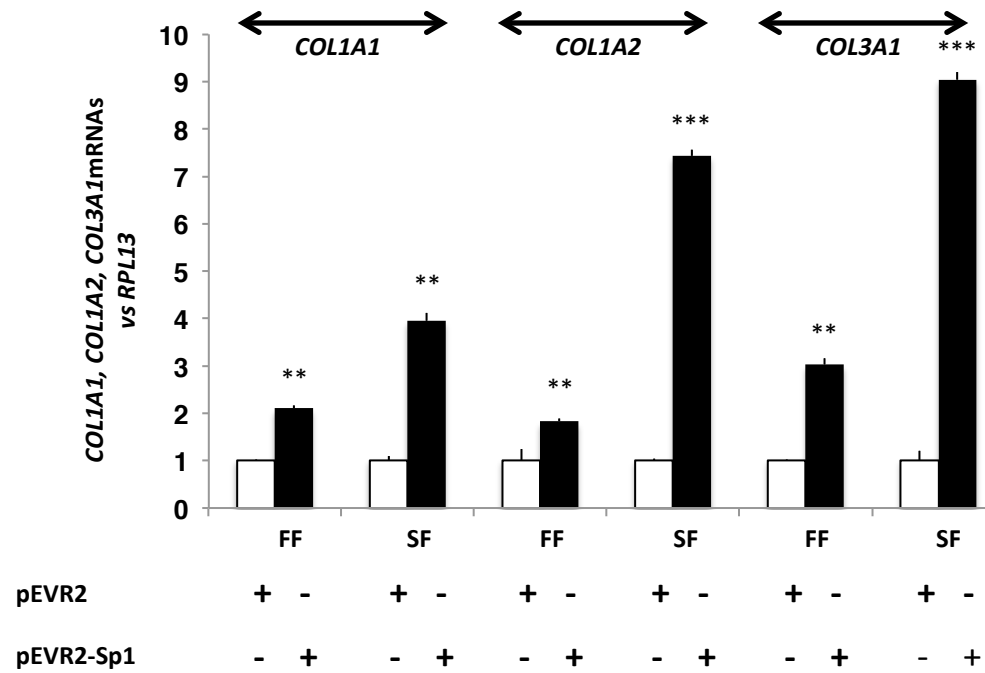

Figure S2

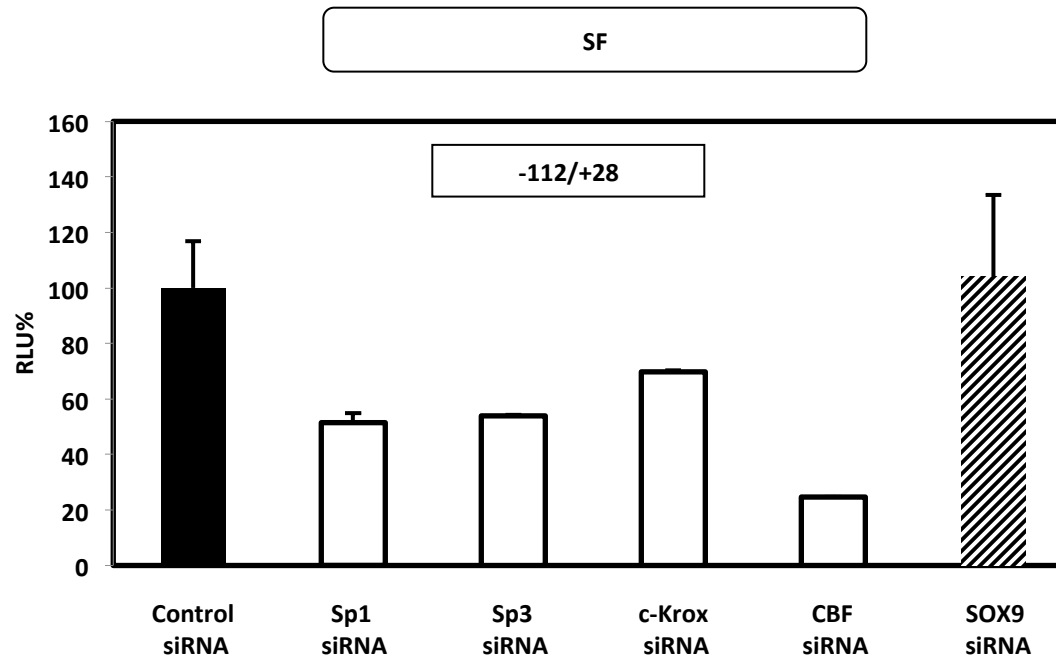

Figure S3

Supplement: supp_M111.286443_jbc.M111.286443-1.pdf [file supp_M111.286443_jbc.M111.286443-1.pdf]
